# Supplementary material for: Feasibility analysis of flexible bronchoscopy in conjunction with noninvasive ventilation for therapy of hypoxemic patients with Central Airway Obstruction: a retrospective study
Source: PeerJ. 2020 Apr 8;8:e8687. doi: 10.7717/peerj.8687 (PMC7150544; doi:10.7717/peerj.8687)
Supplement: Data S1 [file peerj-08-8687-s001.xlsx]

## Sheet: ID
NIV		Control
230071		197901
114175		234203
230987		236652
232769		233195
233364		238656
237690		238712
240818		240629
244545		245721
243615		262308
246031		248695
246847		249385
257978		250542
260013		253898
259987		255587
263060

## Sheet: Gender
NIV		Control
F		F
F		F
M		M
M		M
M		M
F		M
M		M
F		M
M		F
M		M
M		F
M		M
M		M
F		M
M

## Sheet: Age
NIV		Control
78		76
44		43
42		42
44		51
42		55
28		62
66		64
64		71
70		75
58		63
76		77
81		80
62		46
59		58
48
57.4667		61.6429
15.0858		12.5391
				0.442585

## Sheet: Diagnosis
NIV		Control
malignant		belign
belign		belign
malignant		malignant
malignant		malignant
belign		malignant
belign		malignant
malignant		malignant
belign		malignant
malignant		belign
belign		malignant
malignant		belign
malignant		malignant
malignant		malignant
malignant		malignant
malignant

## Sheet: Procedure
NIV		Control
A		B
A,B		B,E
A,C		A,C
A,C		A,C
A,B,C		A,C
B,C		A,C
A,C		A,C
B,C,E		A,C
A,C		B,E
B,C,E		A,C
A,C		B,E
A,C		A,C
A,C		A,C
A,C		A,C
A,C

## Sheet: rise of CT
NIV		Control
22		20
32		31
26		26
20		28
41		32
33		30
39		56
18		25
40		38
33		30
24		22
28		49
39		49
55		56
46
33.0667		35.1429
10.0297		11.8975
					0.627137
CT

## Sheet: basal BP
NIV		Control
140		138
140		140
151		144
137		135
138		155
146		135
156		138
120		142
135		130
135		152
142		135
134		130
128		125
145		135
142

## Sheet: HBP
NIV		Control
142		142
139		136
150		145
136		134
140		156
144		134
160		140
124		140
136		130
130		154
140		132
138		132
126		122
148		134
145
139.867		137.929

## Sheet: LBP
NIV		Control
132		122
128		112
105		92
118		106
105		100
112		90
125		110
132		120
116		115
108		100
135		96
118		105
122		110
128		118
140
121.6		106.857

## Sheet: basal HR
NIV		Control
120		112
118		118
115		115
120		120
113		110
118		114
116		112
114		120
100		122
102		105
116		114
112		122
106		100
98		106
116

[truncated: 6 more sheets: MAX HR, MIN HR, pao2b, pao2a, procedure time, Site]
